# Supplementary material
Source: PubMed Central journal article supplement (PMC4085275)
Supplement: NIHMS396456-supplement-1_si_001.pdf [file NIHMS396456-supplement-1_si_001.pdf]

SUPPLEMENTARY INFORMATION:

Multiplexed Enrichment and Detection of Malarial Biomarkers  
using a Stimuli-Responsive Iron Oxide and Gold Nanoparticle  
Reagent System

*Michael A. Nash<sup>1, 2</sup>, John N. Waitumbi<sup>3</sup>, Allan S. Hoffman<sup>1</sup>, Paul Yager<sup>1</sup>, and Patrick S.  
Stayton<sup>1, \*</sup>*

<sup>1</sup> Department of Bioengineering, University of Washington, Seattle, WA 98195 USA

<sup>2</sup> Current affiliation: Lehrstuhl für Angewandte Physik and Center for NanoScience,  
Ludwig-Maximilians-Universität, D-80799 Munich, Germany

<sup>3</sup> Walter Reed Project, Kenya Medical Research Institute, Kisumu, Kenya

\*Corresponding author.

Patrick S. Stayton, Ph.D.

University of Washington

Department of Bioengineering

Box 355061

Seattle, WA 98195

Tel: (206) 685-8148

Fax: (206) 685-8526

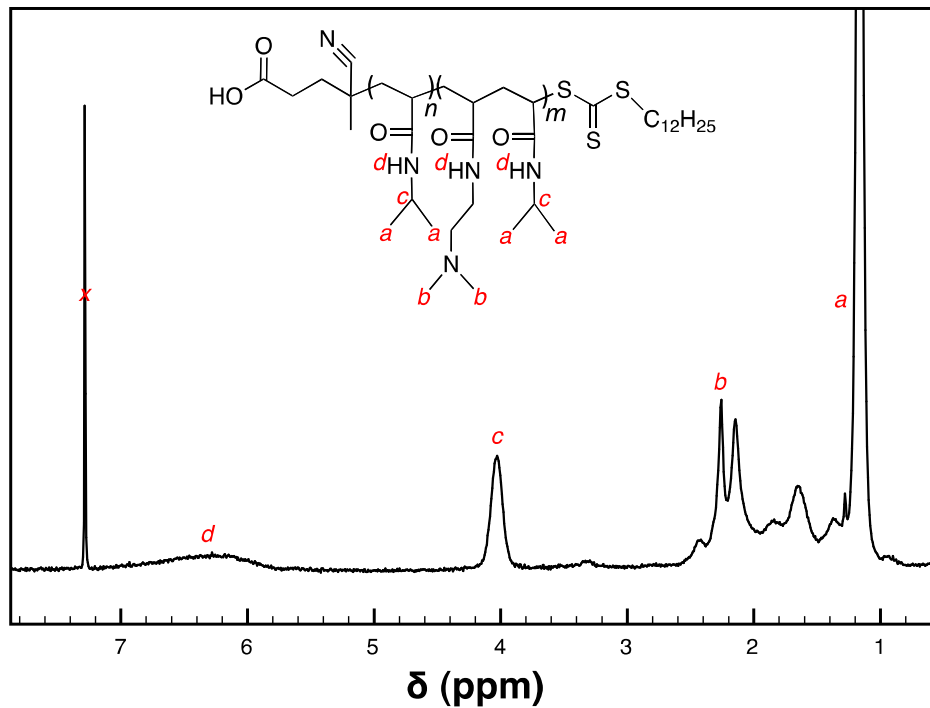

**Supplementary Figure 1.** Polymer NMR spectrum. The purified diblock copolymer in DI water was treated with 10 equivalents of NaOH to deprotonate the amine groups prior to lyophilization and analysis by <sup>1</sup>H-NMR (300 MHz., CDCl<sub>3</sub>).

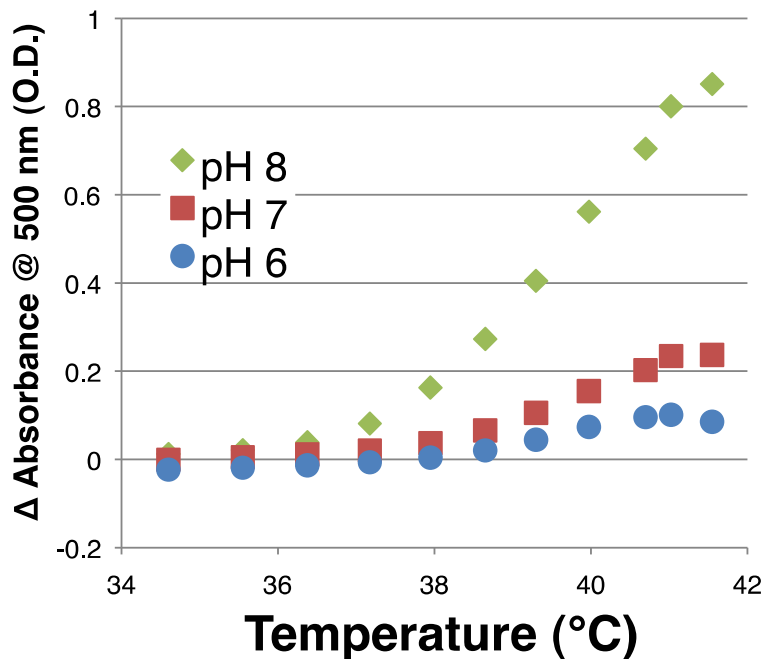

**Supplementary Figure 2.** Thermal aggregation profile of the diblock copolymer (2 mg/mL in PBS) exhibits pH-dependence due to amine groups. Light scattering (turbidity) was monitored as the sample temperature was ramped from room temperature to 45 °C over six minutes. Protonation of the amine groups in the polymer at pH 6 and 7 resulted in electrostatic repulsions that prevented strong aggregation and light scattering, as was seen at pH 8.

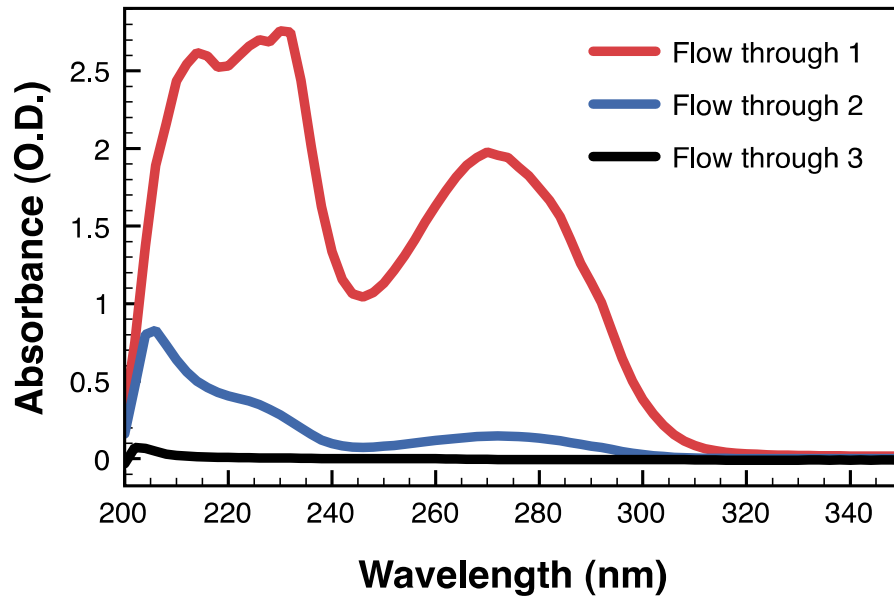

**Supplementary Figure 3.** Removal of non-conjugated streptavidin from SA-AuNPs.

After conjugation of the polymer-modified AuNPs to streptavidin, the non-conjugated streptavidin was removed by membrane ultrafiltration. The UV absorbance at 280 nm was monitored during each round of ultrafiltration to confirm removal of the non-conjugated protein.

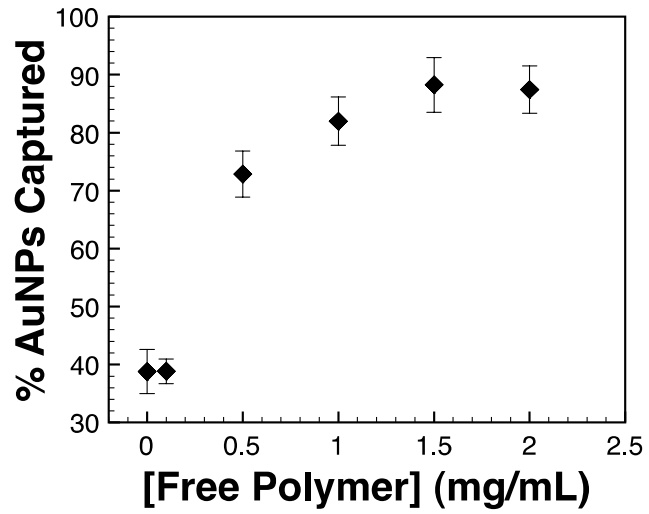

**Supplementary Figure 4.** Effect of 10 kDa homo-pNIPAm free polymer on AuNP capture efficiency (mean  $\pm$  standard deviation, n=5). The optimum value of 1.5 mg/mL free polymer was used in further magnetic enrichment lateral flow immunoassay protocols.

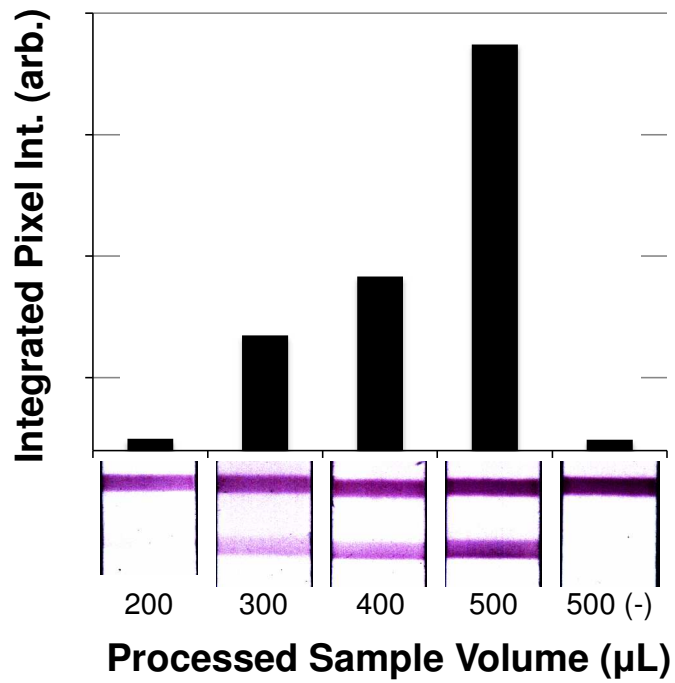

**Supplementary Figure 5.** (Top) Stepwise/incremental increases in signal for the clinical sample processed at increasing volumes from 200 to 500 µL. (Bottom) Corresponding flow strip images. A negative control at the highest volume processed (500 (-)) showed low background noise.

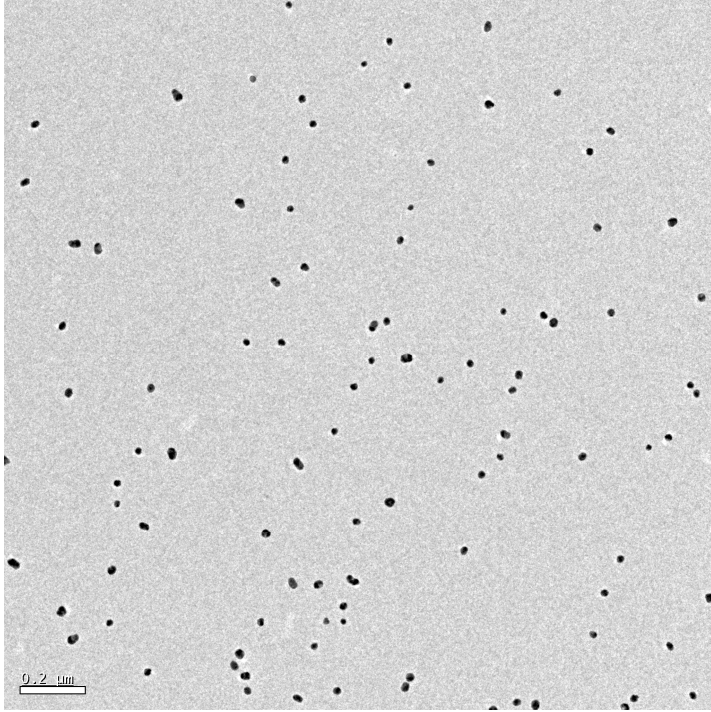

**Supplementary Figure 6.** Transmission electron micrograph (200 kV) of citrate-reduced AuNPs. The AuNPs were aerosolized onto carbon stabilized formvar coated copper grids (Ted Pella) prior to analysis. Scale bar=200 nm.

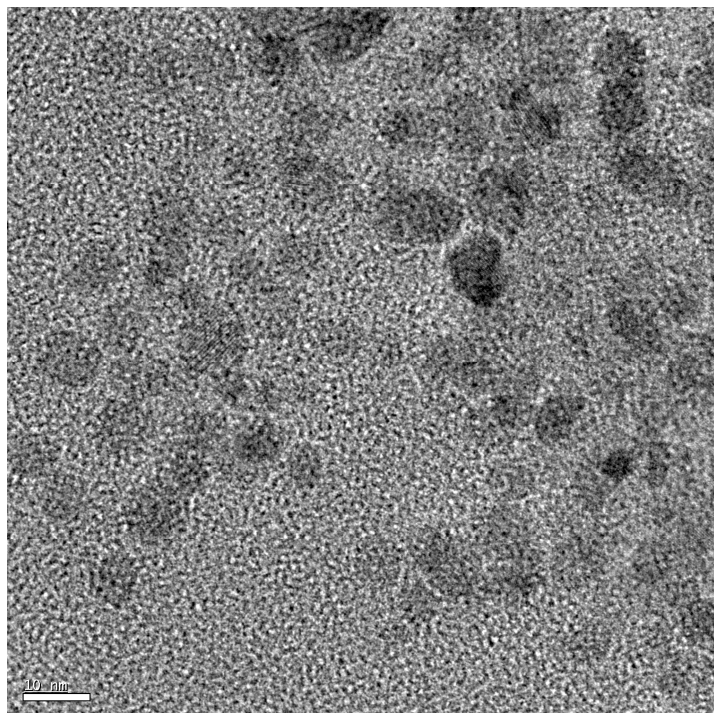

**Supplementary Figure 7.** Transmission electron micrograph (200 kv) of pNIPAm-mNPs. Scale bar = 10 nm.



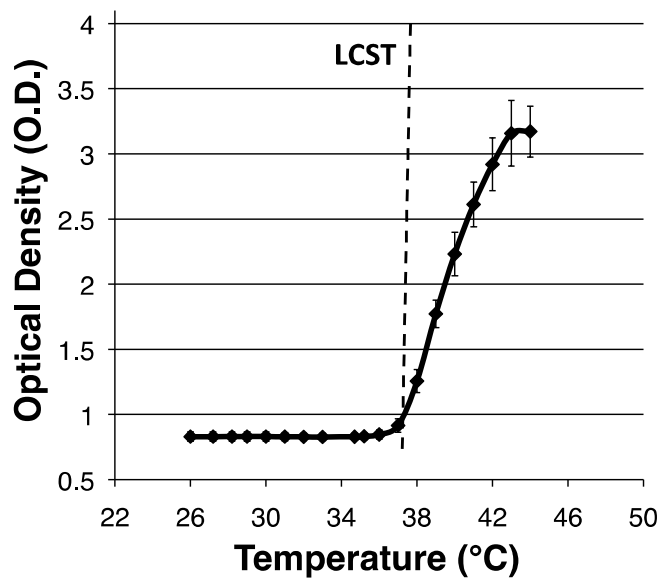

**Supplementary Figure 8.** Phase separation of mNPs. The phase transition temperature of pNIPAm-mNPs dissolved at 2.5 mg/mL in PBS 7.4 was monitored using spectrophotometry. The solution temperature was raised at a rate of 1.2°/min ( $\lambda=600$  nm).

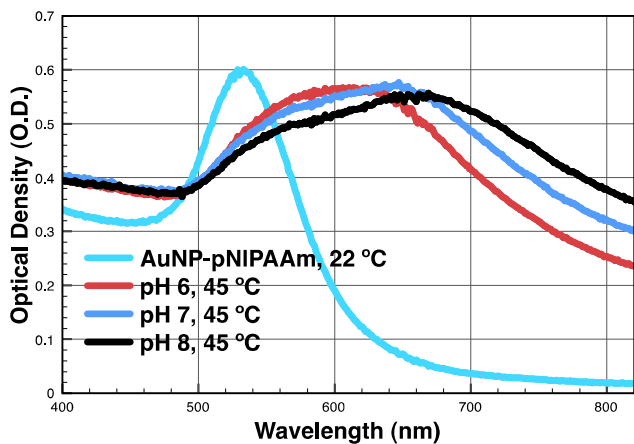

**Supplementary Figure 9.** pH response of AuNPs above the transition temperature. The diblock-pNIPAAm-modified AuNPs (PBS buffer pH 6, 7, or 8) were heated above the phase transition temperature of the polymer. Deprotonation of the tertiary amines upon raising the pH above the  $pK_a$  ( $\approx 8.0$ ) resulted in increased nearfield plasmonic coupling at pH 8. Heated spectra were measured after a fixed heating time of 8.3 minutes at 45 °C.

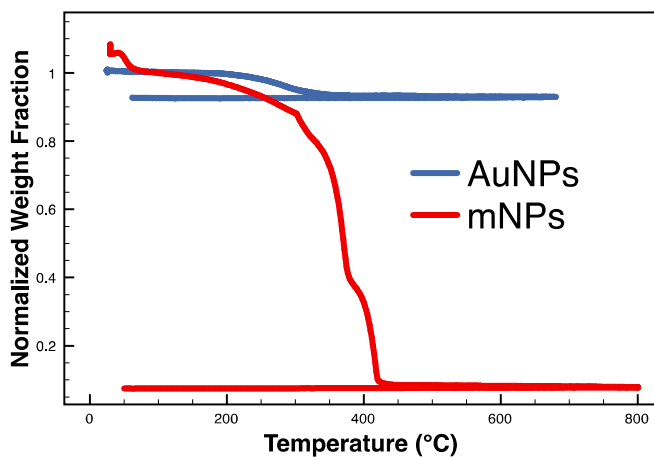

**Supplementary Figure 10.** Thermogravimetric analysis of the mNPs and AuNPs. The diblock modified AuNPs were found to be 7% organic content by weight. The mNPs were found to be 92.6% organic content by weight.
